# Supplementary material for: MWCNT-mesoporous silica nanocomposites inserted in a polyhedral metal–organic framework as an advanced hybrid material for energy storage device
Source: Royal Society of Chemistry journal article supplement (doi:10.1039/d1nj03460j), 2021-01-01
Supplement: d1nj03460j1.pdf [file d1nj03460j1.pdf]

## Electronic Supplementary Information

### **MWCNTs-mesoporous silica nanocomposites inserted in polyhedra metal-organic framework as an advanced hybrid material for energy storage device**

Zahra Andikaey<sup>a</sup>, Ali A. Ensafi<sup>\*a</sup>, Behzad Rezaei<sup>a</sup>, Shaghayegh Sadeghi Malek<sup>a</sup>  
and Jin-Song Hu<sup>b</sup>

*a. Department of Chemistry, Isfahan University of Technology, Isfahan 84156-83111, Iran.*

*b. Institute of Chemistry, Chinese Academy of Sciences, Beijing 100190, P.R. China*

**Published in New J. Chem.**

**Table S1.** BET surface area and BJH pore size distribution of the samples.

| Sample      | $a_{s,BET}$ ( $m^2 g^{-1}$ ) | pore size distribution (nm) |
|-------------|------------------------------|-----------------------------|
| fCNT        | 140.84                       | 2.8                         |
| 10% SBA/CNT | 242.45                       | 3.2                         |
| 20% SBA/CNT | 296.20                       | 3.5                         |
| 30% SBA/CNT | 498.31                       | 4.0                         |
| SC@NCC-BTC  | 151.50                       | 2.4                         |

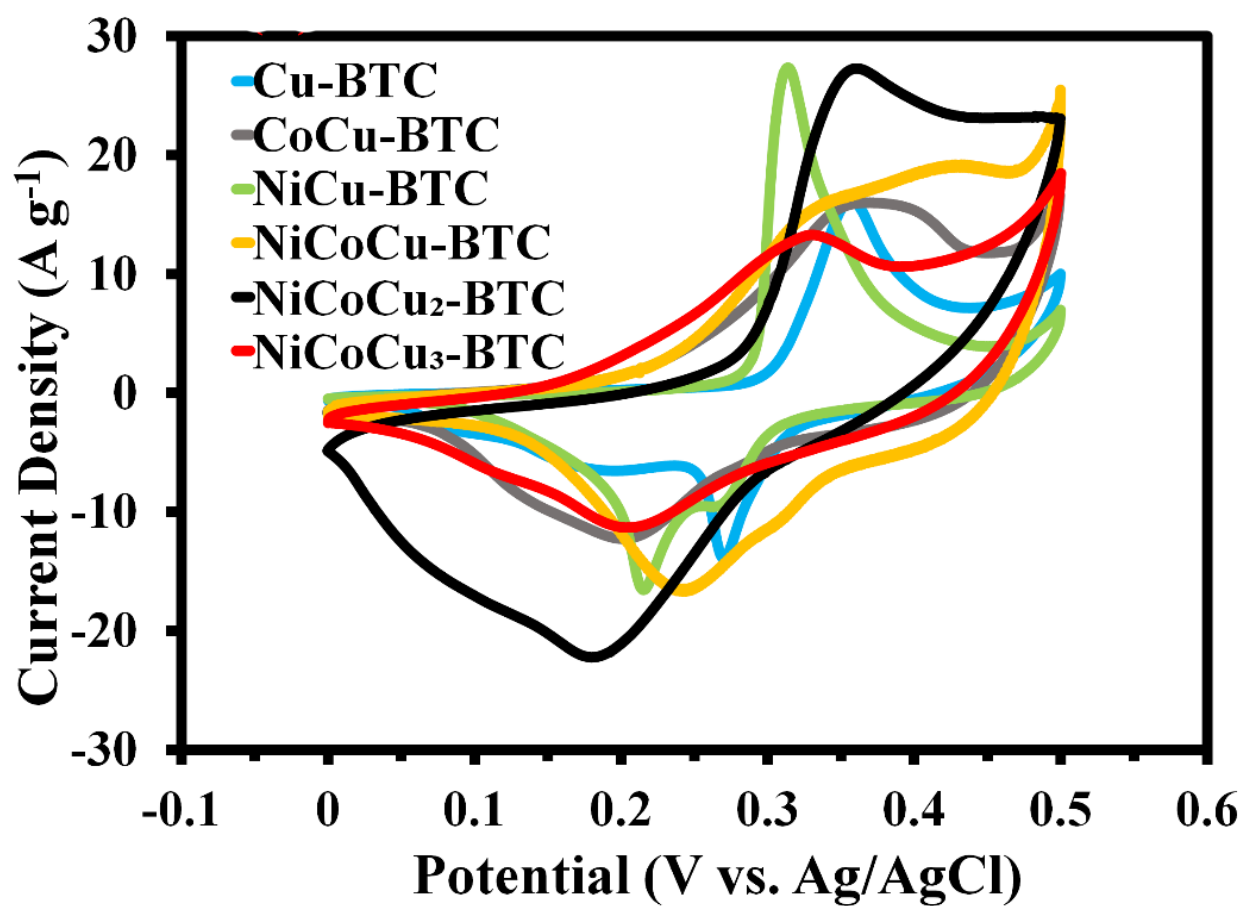

**Figure S1 (a)** CV curves of Cu-BTC, CoCu-BTC, NiCu-BTC, NiCoCu-BTC, NiCoCu<sub>2</sub>-BTC, NiCoCu<sub>3</sub>-BTC at  $20 \text{ mV s}^{-1}$ ;

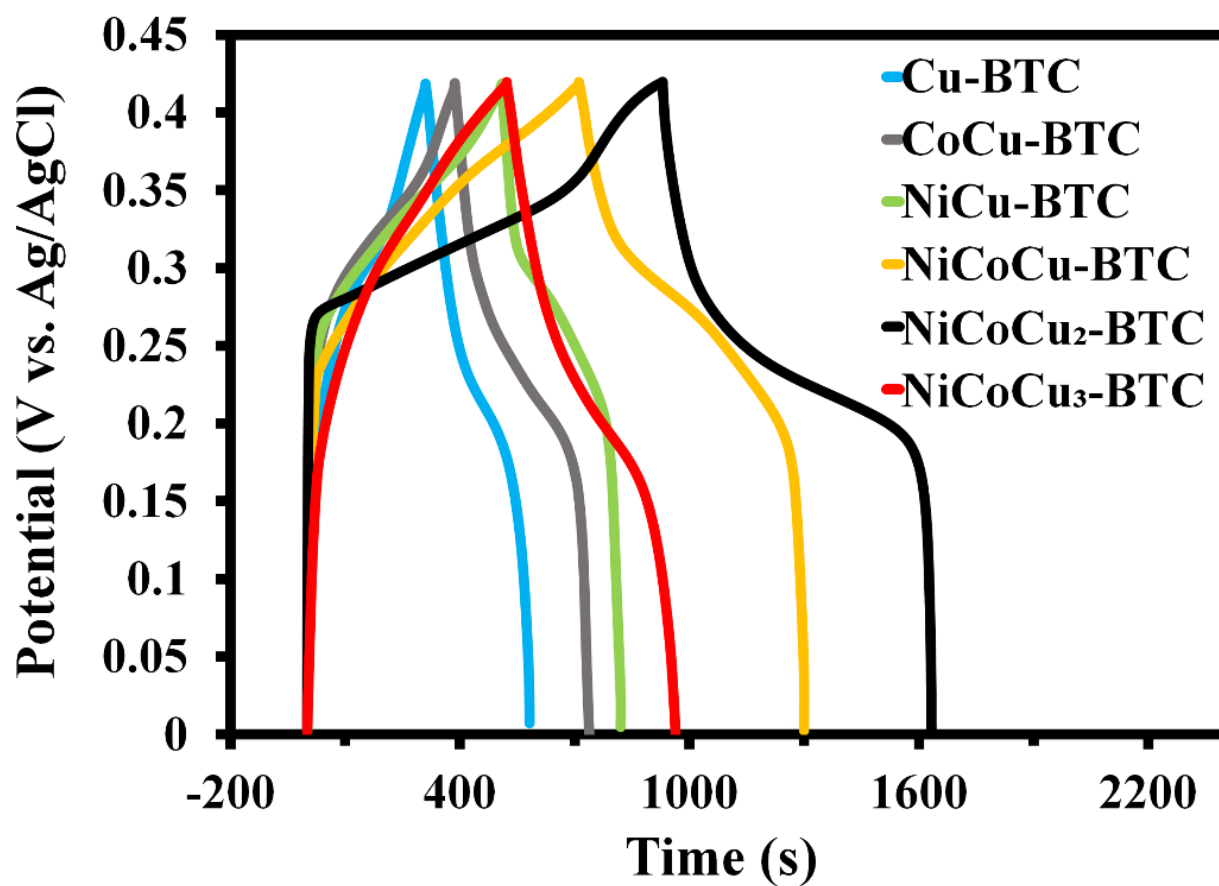

**Figure S2** GCD curves of Cu-BTC, CoCu-BTC, NiCu-BTC, NiCoCu-BTC, NiCoCu<sub>2</sub>-BTC, NiCoCu<sub>3</sub>-BTC at 1.0 A g<sup>-1</sup>;

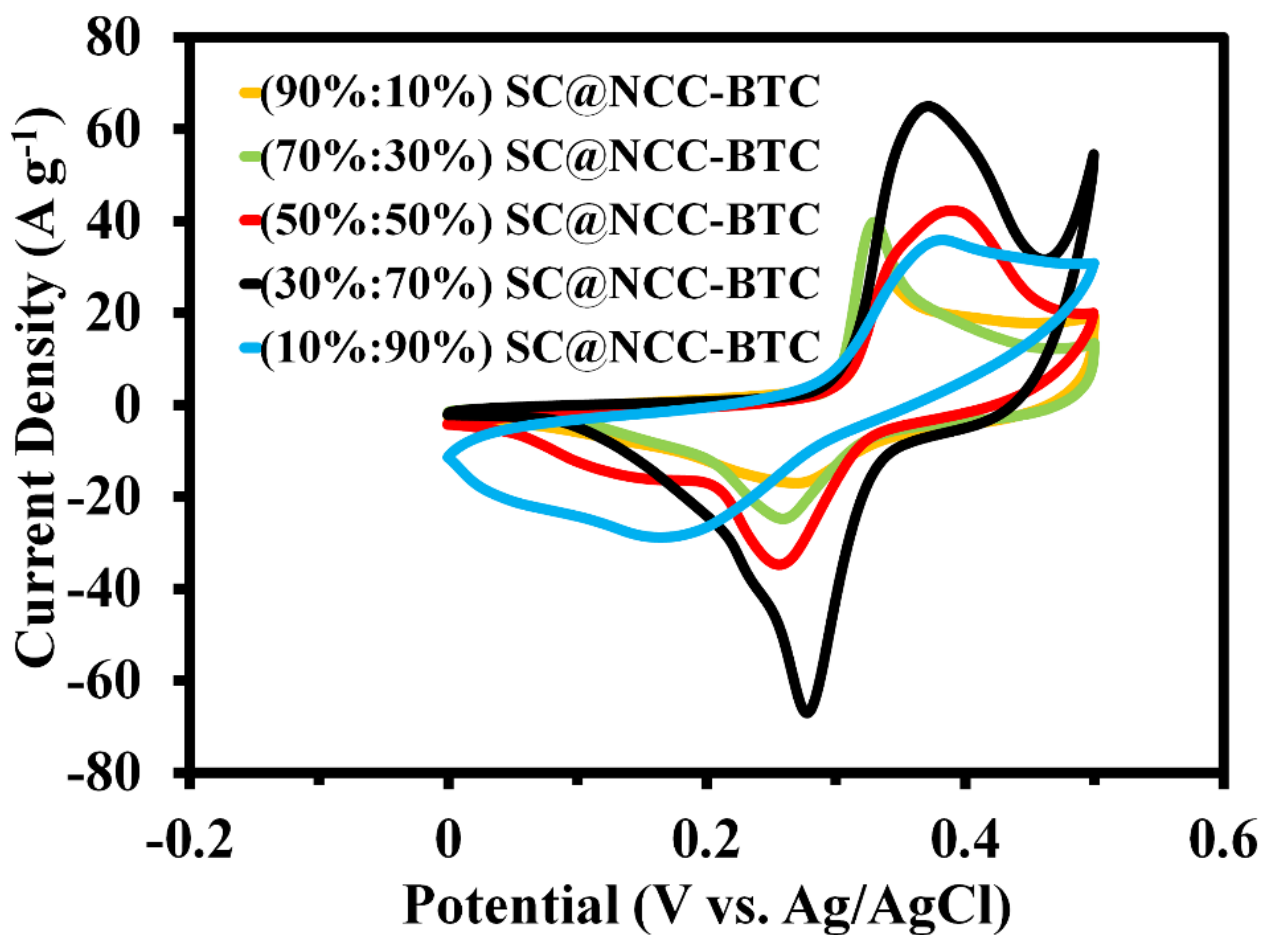

**Figure S3** Optimization of the SC percentage in SC@NCC-BTC composite, CVs of SC@NCC-BTC electrode in different SC@NCC-BTC ratios of 90:10, 70:30, 50:50, 30:70, and 10:90, respectively; The CVs were recorded at a sweep rate of  $20 \text{ mV s}^{-1}$  in  $3.0 \text{ mol L}^{-1}$

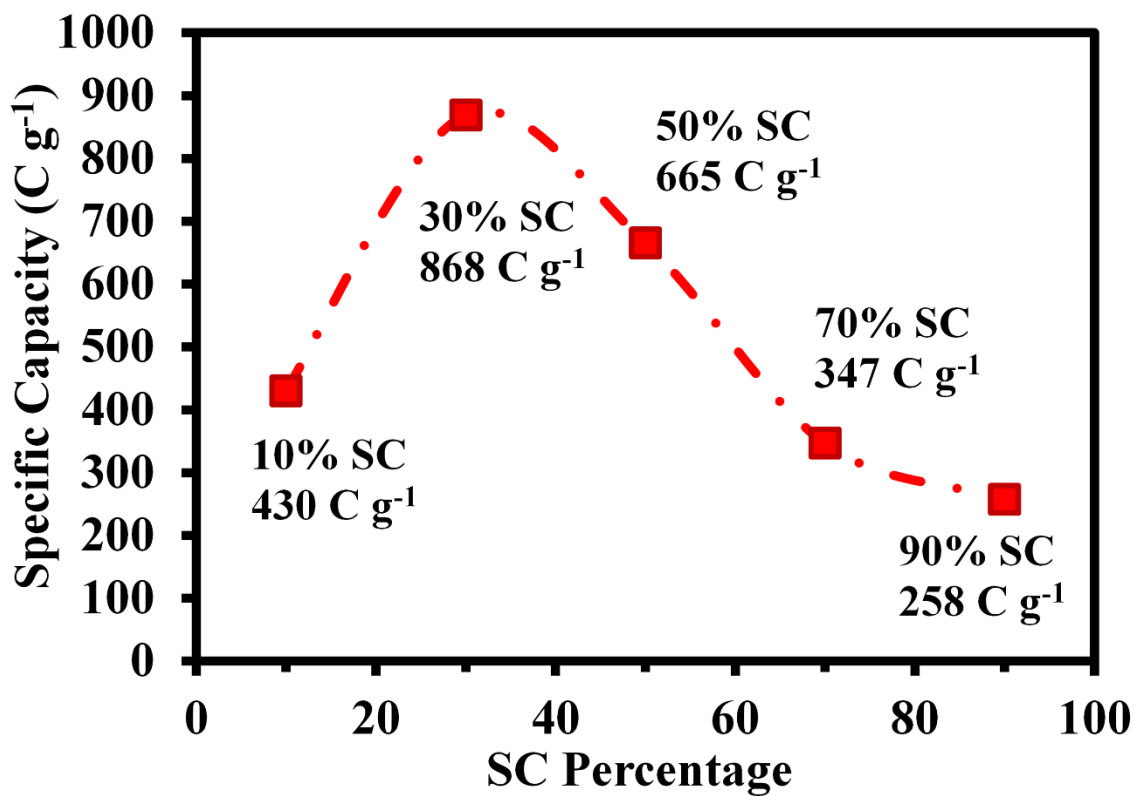

**Figure S4** A plot of the specific capacity of SC@NCC-BTC electrode as a criterion of optimization vs. the SC percentage.

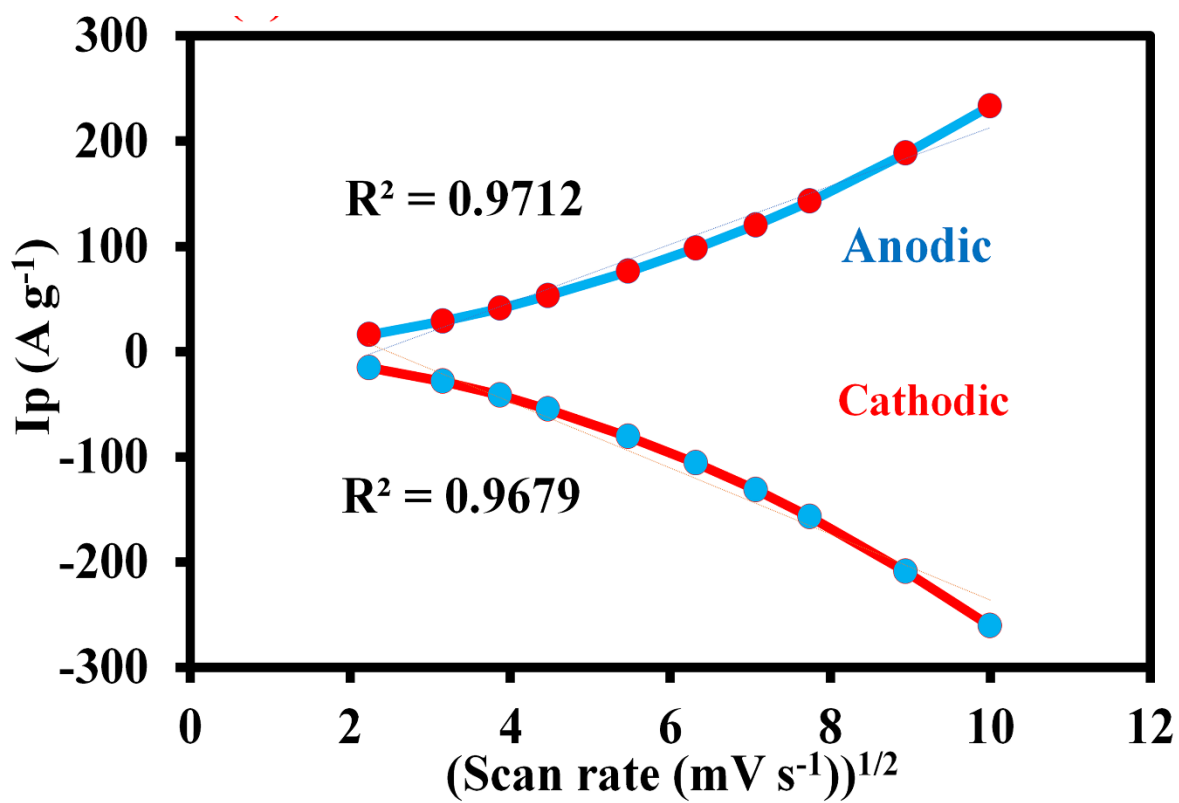

**Figure S5.** The plot of the anodic peak current density vs. the square root of the scan rate ( $v$ );

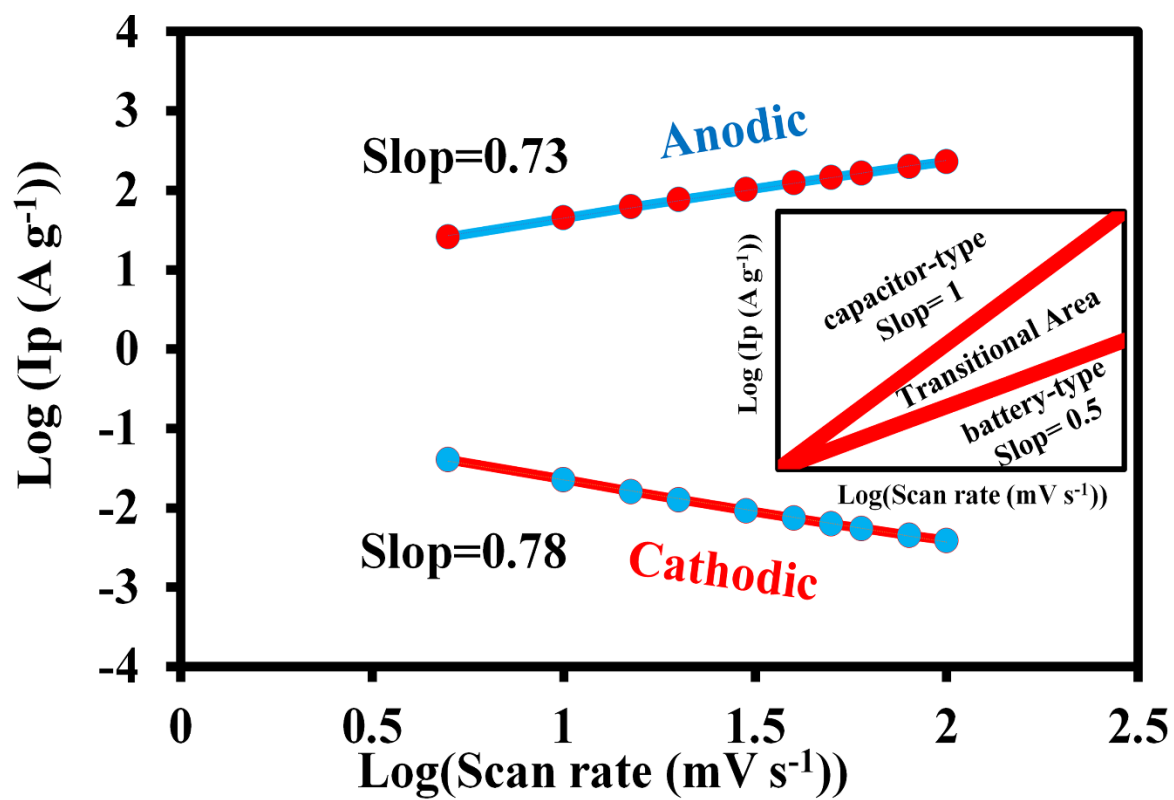

**Figure S6.** log I-log v plot of the anodic and cathodic peak currents.



**Table S2.** Comparison of electrochemical performance of SC@NCC-BTC with some previous reports

| Electrode                                   | Three-electrode system                    |                    | Two-electrode system                     |                    | Specific power (W/kg)         | Specific energy (Wh/kg)        | Ref. |
|---------------------------------------------|-------------------------------------------|--------------------|------------------------------------------|--------------------|-------------------------------|--------------------------------|------|
|                                             | Capacity (C/g)                            | Stability (cycles) | Capacity (F/g)                           | Stability (cycles) |                               |                                |      |
| rGO-HKUST-1                                 | 385 F/g at 1 A/g                          | -                  | 193 F/g at 1 A/g                         | 4000, 98.5%        | 3100                          | 42                             | 1    |
| HKUST-1/PANI                                | 277 F/g at 1 A/g                          | -                  | 19.93 F/g at 0.5 A/g,                    | 2000, 87%          | 7497                          | 6.22                           | 2    |
| L-rGO-C-MOF                                 | 390 C/g at 5 mV/s                         | 5000, 97.8 %       | -                                        | -                  | 8037.5                        | 22.3                           | 3    |
| Cu-Ni-Ce-Co oxide@SS                        | 1078 C/g at 1 A/g                         | 3000, 86.5%        | 183.3 F/g at 1 A/g                       | 3000, 92%          | 581.9                         | 51                             | 4    |
| CuCo <sub>2</sub> S <sub>4</sub> @Ni-Mn LDH | 1260 C/g at 1 A/g                         | 10000, 94.3%       | 146.7 F/g at 2 A/g                       | 10000, 87.6%       | 750                           | 40.5                           | 5    |
| NCZF                                        | 457.2 C/g at 1 A/g                        | 30000, 97.95%      | 222 F/g at 1 A/g                         | 10000, 61.9%       | 800                           | 49.3                           | 6    |
| Cu-MOF/G                                    | 192.8 C/g at 10 mV/s                      | 1000, 93.8%        | 66 F/g at 0.5 A/g                        | -                  | 1350                          | 34.5                           | 7    |
| NiCoS@SBA-C                                 | 703 C/g at 1 A/g                          | 5000, 78.57%       | 109.1 F/g at 1 A/g                       | 5000, 94.59%       | 800                           | 38.8                           | 8    |
| CCS                                         | 300 C/g at 1 A/g                          | -                  | 122.9 F/g at 1 A/g                       | 6000, 87.0 %       | 750                           | 38.4                           | 9    |
| Cu@Ni@NiCoS NFs                             | 6.94 $\mu$ A h/cm <sup>2</sup> at 10 mV/s | 10000, 89%         | 24.35 $\mu$ A h/cm <sup>3</sup> at 1 A/g | 10000, 92%         | 11.16 $\mu$ W/cm <sup>2</sup> | 0.48 $\mu$ W h/cm <sup>2</sup> | 10   |

|                                                                     |                     |               |                        |               |          |       |               |
|---------------------------------------------------------------------|---------------------|---------------|------------------------|---------------|----------|-------|---------------|
| Co-Ni-S NPs/Cu-Ni-Mn-O NSAs                                         | 263 mA h/g at 2 A/g | 5000, 97.39%  | 121.51 mA h/g at 1 A/g | 5000, 98.26%  | 6629.53  | 75.65 | <sup>11</sup> |
| CCO@CC                                                              | 973.6 C/g at 1 A/g  | 10000, 93.76% | 182.7 F/g at 1 A/g     | 10000, 93.25% | 749.75   | 57.1  | <sup>12</sup> |
| Ni-Cu (OH) <sub>2</sub> @Ni-Cu-Se                                   | 158.95 F/g at 1 A/g | 3000, 24.2 %  | -                      | -             | -        | -     | <sup>13</sup> |
| core-shell Cu <sub>7</sub> S <sub>4</sub> @Ni (OH) <sub>2</sub> /CF | 482.6 C/g at 1 A/g  | 10000, 94.5%  | 230.1 F/g at 1 A/g     | 10000, 68%    | 750 W/kg | 52.5  | <sup>14</sup> |
| SC@NCC-BTC                                                          | 868 C/g 1 A/g       | 5000, 91.2%   | 168 F/g at 1 A/g       | 5000, 87.2%   | 1124     | 52.4  | This work     |

## References:

- 1 P. Srimuk, S. Luanwuthi, A. Krittayavathananon and M. Sawangphruk, *Electrochim. Acta*, 2015, **157**, 69–77.
- 2 E. A. Jafari, M. Moradi, S. Borhani, H. Bigdeli and S. Hajati, *Phys. E Low-Dimensional Syst. Nanostructures*, 2018, **99**, 16–23.
- 3 T. Van Ngo, M. Moussa, T. T. Tung, C. Coghlan and D. Losic, *Electrochim. Acta*, 2020, **329**, 135104.
- 4 L. Halder, A. Maitra, A. K. Das, R. Bera, S. K. Karan, S. Paria, A. Bera, S. K. Si and B. B. Khatua, *ACS Appl. Electron. Mater.*, 2019, **1**, 189–197.
- 5 J. Lin, H. Jia, H. Liang, S. Chen, Y. Cai, J. Qi, C. Qu, J. Cao, W. Fei and J. Feng, *Chem. Eng. J.*, 2018, **336**, 562–569.
- 6 X. Zhou, H. Dai, X. Huang, Y. Ren, Q. Wang, W. Wang, W. Huang and X. Dong, *Mater. Today Energy*, 2020, **17**, 1–8.
- 7 M. Azadfalsh, A. Sedghi and H. Hosseini, , DOI:10.1007/s11664-019-07505-y.
- 8 Y. Chen, C. Jing, X. Fu, M. Shen, K. Li, X. Liu, H. C. Yao, Y. Zhang and K. X. Yao, *Chem. Eng. J.*, 2020, **384**, 123367.
- 9 L. He, J. Liu, L. Yang, Y. Song, M. Wang, D. Peng, Z. Zhang and S. Fang, *Electrochim. Acta*, 2018, **275**, 133–144.
- 10 B. S. Soram, I. S. Thangjam, J. Y. Dai, T. Kshetri, N. H. Kim and J. H. Lee, *Chem. Eng. J.*, 2020, **395**, 125019.
- 11 C. V. V. M. Gopi, R. Vinodh, S. Sambasivam, I. M. Obaidat, S. Singh and H. J. Kim, *Chem. Eng. J.*, 2020, **381**, 122640.
- 12 Y. Chen, H. Hu, N. Wang, B. Sun, M. Yao and W. Hu, *Chem. Eng. J.*, 2019, 123536.
- 13 V. T. Chebrolu, B. Balakrishnan, V. Raman, I. Cho, J. S. Bak, K. Prabakar and H. J. Kim, *Appl. Surf. Sci.*, 2020, **506**, 145015.
- 14 Y. Zhou, S. Zhao, X. Yu, Y. Li, H. Chen and L. Han, *Inorg. Chem. Front.*, 2020, **7**, 427–436.
